# Supplementary material
Source: publisher figshare collection journal article supplement (https://acs.figshare.com/ndownloader/files/3867661)
Supplement: Supplementary file 1 [file 3867661]

# Karwinaphthopyranones isolated from the Fruits of *K. parvifolia* and Their Cytotoxic Activities

Claudia Rojas-Flores,<sup>†,‡</sup> María Yolanda Rios,<sup>†,‡</sup> Rebeca López-Marure,<sup>§</sup> and Horacio F. Olivo<sup>\*,†</sup>

<sup>†</sup>*Medicinal and Natural Products Chemistry, The University of Iowa, Iowa City, IA 52242, U.S.A.*

<sup>‡</sup>*Centro de Investigaciones Químicas, Universidad Autónoma del Estado de Morelos, Avenida Universidad 1001, Col. Chamilpa, 62209 Cuernavaca, Morelos, México*

<sup>§</sup>*Departamento de Biología Celular, Instituto Nacional de Cardiología “Ignacio Chávez,” Juan Badiano No. 1, Colonia Sección 16, Tlalpan, C. P. 14080, México D. F., México*

## CYTOTOXICITY STUDIES

### Materials

DMEM, RPMI-1640, antibiotic-antimycotic 100X solution, MEM non-essential amino acids solution (100X), 0.25% trypsin-EDTA solution, fetal bovine serum (FBS), and newborn calf serum (NBCS) were purchased from GIBCO/BRL (Grand Island, NY). Sterile plastic material for tissue culture was purchased from Corning (Corning, NY). All other chemicals were purchased from Sigma Aldrich (St. Louis, MO).

### Tumor cells culture

All tumor cell lines were purchased from ATCC (American Type Culture Collection). U373 cells were cultured in DMEM medium supplemented with 4500 mg/l glucose, 5% newborn bovine calf serum (NBCS), glutamine (2 mM), pyruvate (1 mM), antibiotic-antimycotic, and MEM non-essential amino acids 1X. The other cell lines were cultured in RPMI-1640 medium supplemented with 5% NBCS and L-glutamine (2 mM).

### Cell viability assay

Cell viability was determined by 3-(4,5-dimethylthiazol-2-yl)-2,5-diphenyltetrazolium bromide (MTT) reduction assay, which is used for cell proliferation and cytotoxicity assays.<sup>1</sup> MTT is

---

<sup>1</sup> (a) Mosmann, T. J. *Immunol. Methods* **1983**, 65, 55–63.

reduced in metabolically active cells to yield an insoluble purple formazan product. Cells were cultured in 96-well culture dishes and were exposed to different compounds for 48 h. Afterwards, 20 µl/well of a MTT solution (5 mg/ml) was added. Four hours later, the supernatants were discarded and 100 µl/well of acidic isopropyl alcohol (0.04 N HCl) was added to dissolve the formazan. Optical density (OD) was measured on the multiplate spectrophotometer (BIO-TEK Instruments) at 570 nm. Lethal concentration for 50% maximum cell viability (LD<sub>50</sub>) was determined.

---

(b) Tao, Z.; Zhou, Y.; Lu, J.; Duan, W.; He, X.; Lin, L.; Ding, J.; Qin, Y. *Cancer Biol. Ther.* **2007**, *6*, 691-696.
